# Supplementary material for: The role of cis-elements in the evolution of crassulacean acid metabolism photosynthesis
Source: PubMed Central journal article supplement (PMC6938490; doi:10.1038/s41438-019-0229-0), 2020-01-01
Supplement: 41438_2019_229_MOESM2_ESM.pdf [file 41438_2019_229_MOESM2_ESM.pdf]

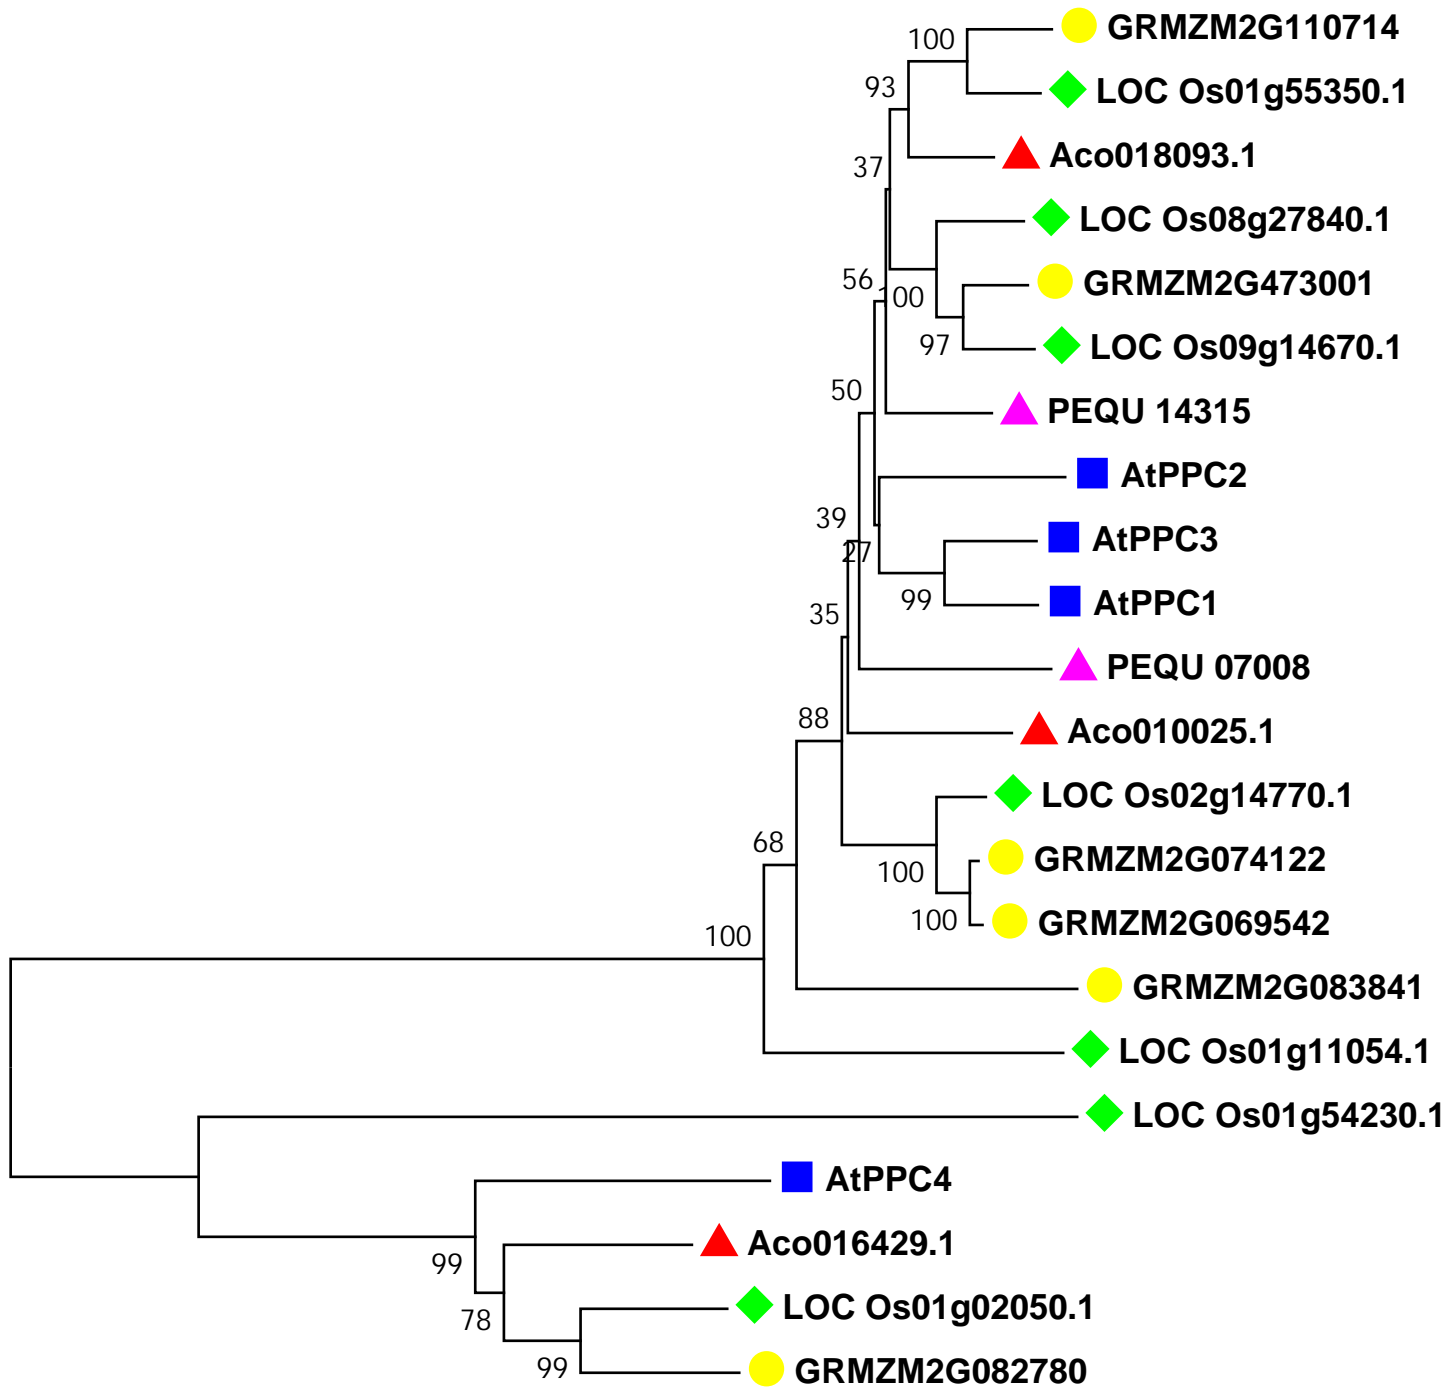

0.1
